# Supplementary material for: Antibacterial coating of tooth surface with ion-releasing pre-reacted glass-ionomer (S-PRG) nanofillers
Source: PubMed Central journal article supplement (PMC7889979; doi:10.1016/j.heliyon.2021.e06147), 2021-02-02
Supplement: mmc1.pdf [file mmc1.pdf]

## *Supplementary information*

# **Antibacterial coating of tooth surface with ion-releasing pre-reacted glass-ionomer (S-PRG) nanofillers**

Kayoko MAYUMI<sup>1</sup>, Hirofumi MIYAJI<sup>1\*</sup>, Saori MIYATA<sup>1</sup>, Erika NISHIDA<sup>1</sup>, Tomokazu FURIHATA<sup>1</sup>, Yukimi KANEMOTO<sup>1</sup>, Tsutomu SUGAYA<sup>1</sup>, Kanako SHITOMI<sup>2</sup>, Tsukasa AKASAKA<sup>3</sup>

<sup>1</sup> Department of Periodontology and Endodontology, Faculty of Dental Medicine, Hokkaido University, N13 W7, Kita-ku, Sapporo, Hokkaido 060-8586, Japan

<sup>2</sup> Division of Periodontology and Endodontology, School of Dentistry, Health Sciences University of Hokkaido, 1757 Kanazawa, Tobetsu-cho, Ishikari-gun, Hokkaido 061-0293, Japan

<sup>3</sup> Department of Biomedical Materials and Engineering, Faculty of Dental Medicine, Hokkaido University, N13 W7, Kita-ku, Sapporo, Hokkaido 060-8586, Japan

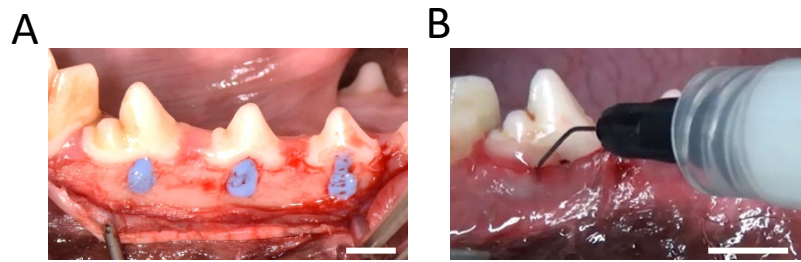

**Fig. S1.** Surgical procedure and S-PRG nanofiller coating

(A) Digital photographs of experimental furcation defect filled with impression material.

(B) Application of S-PRG nanofiller to tooth root surface using a syringe. Scale bar = 1

mm. S-PRG, surface pre-reacted glass-ionomer.

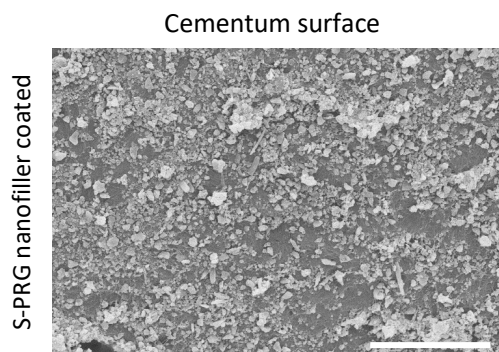

**Fig. S2.** SEM images of root cementum surface coated with S-PRG nanofillers. Scale bar

= 10  $\mu$ m. SEM, scanning electron microscopy; S-PRG, surface pre-reacted glass-ionomer.
